# Supplementary material for: Emergency front-of-neck access in cardiac arrest: A scoping review
Source: PubMed Central journal article supplement (PMC11074978; doi:10.1016/j.resplu.2024.100653), 2024-05-04
Supplement: mmc1.pdf [file mmc1.pdf]

# Emergency front-of-neck access in cardiac arrest: A Scoping Review

## Table of contents

|                                                      |         |
|------------------------------------------------------|---------|
| S1- Completed ILCOR scoping review protocol template | Page 2  |
| S2- Data extraction items                            | Page 7  |
| S3- MEDLINE search strategy                          | Page 8  |
| S4- Embase search strategy                           | Page 10 |
| S5- Cochrane library search strategy                 | Page 12 |

# S1- Completed ILCOR scoping review protocol template

TF SR/ScR PICOST Template 16 Sept 2019 v\_1.0 SAC approved 16September2019

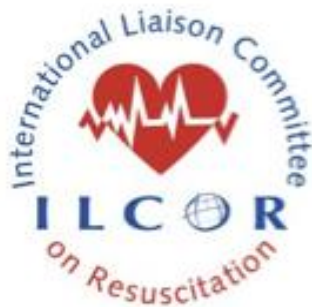

## Task Force Based Review PICOST Template

- Task Force Led Systematic Review
- Task Force Led Scoping Review
- Need IS assistance with search strategy
- Team will use their own IS

This template is designed to help guide the preparation of a research question by Population Intervention Comparator Outcome Study design and Timeline (PICOST) to guide a Task Force based Systematic Review (TFSR) and a Task Force based Scoping Review (TFScR). This is a key step in the design of any systematic review (SR) or scoping review. The initial PICOST for a Systematic Review is typically very specific but that for a Scoping review may be very broad. The TF based Review PICOST template is to be prepared by the Task Force SR/ScR team lead with the oversight of the Task Force Scientific Advisory Committee (SAC) representative(s), and then forwarded to SAC for acknowledgement.

The Task Force SAC representative is the key liaison between SAC and the Taskforce.

PICOST Short Title (*edit*)

**Front of neck access in cardiac arrest**

### 1. TF Research Question based on PICOST

(Population, Intervention, Control, Outcomes, Study design and Timeframe)

| PICOST       | Description ( <i>with recommended text</i> )                                                                                                                                                                                                                                                                               |
|--------------|----------------------------------------------------------------------------------------------------------------------------------------------------------------------------------------------------------------------------------------------------------------------------------------------------------------------------|
| Population   | Adult patients in cardiac arrest in any setting, where adequate ventilation cannot be rapidly achieved using basic/ advanced airway management strategies                                                                                                                                                                  |
| Intervention | Front-of-neck access attempt                                                                                                                                                                                                                                                                                               |
| Comparison   | Ongoing attempts at basic/advanced airway management strategies.                                                                                                                                                                                                                                                           |
| Outcomes     | Any clinical outcome. (preset text)                                                                                                                                                                                                                                                                                        |
| Study Design | Randomized controlled trials (RCTs) and non-randomized studies (non-randomized controlled trials, interrupted time series, controlled before-and-after studies, cohort studies), case series (cases $\geq 5$ ) are eligible for inclusion. Unpublished studies (e.g., conference abstracts, trial protocols) are excluded. |
| Timeframe    | All years and all languages are included as long as there is an English abstract                                                                                                                                                                                                                                           |

### 2. Task Force Systematic/Scoping Review (TFSR/TFScR) Team

\*All TFSR/TFScR team members (including non-TF members) are expected to have completed the generic AHA COI documentation.

TF chair or delegate will confirm COI through topic specific disclosures prior to assignment.

ILCOR COI Policy and the COI Committee are resources to address any questions.

- TFC attestation: I have checked for fiscal and intellectual conflict of interests and found none
- I have check for fiscal and intellectual conflict of interests; Author XXX (eg-has published study on Y and is excluded from bias assessment and xxxxxxxx

**TFSR/TFScR team**

| Role                                | Name                                      | Topic specific COI reviewed | Notes                     |
|-------------------------------------|-------------------------------------------|-----------------------------|---------------------------|
| *Task Force SR/ScR Team Lead        | Keith Couper                              |                             | (needs to be TF member*)  |
| * Task Force SR/ScR Content Experts |                                           |                             | Can be from outside of TF |
| *TF SAC representative(s)           |                                           |                             | (assigned by SAC)         |
| Research fellows                    | Mohammed Aljanoubi<br>Abdulkarim Almazrua |                             |                           |

Notes on COI: e.g. Author XXX has published study on Y and is excluded from bias assessment and xxxxxxxx

**3. Pre-existing PICOs Related to scope of work for this PICOST (e.g. 2010, 2015):**

Insert all PICOs as worded on the master document and include AHA number to assist in retrieval of previous work. (note: This information is available in the file: ILCOR PICO List on [ilcor.org](http://ilcor.org)). Insert Not Applicable if none exist.

Not Applicable

**4. Definitions:** (This should include definitions of all the key relevant terms identified in the PICOST and in the body of literature related to this topic)

Adequate ventilation: ventilation that is, in the view of the attending healthcare provider, adequate for current treatment delivery

Basic/advanced airway management strategies: Conventional strategies including head positioning, use of simple airway adjuncts, supraglottic airway, and tracheal intubation (e.g. Newell 2018 190; <https://doi.org/10.1186/s13054-018-2121-y>)

Front-of-neck access: access to the trachea through the front of the neck (e.g. needle cricothyroidotomy, tracheostomy) to facilitate ventilation/ oxygenation

**5. Notes:** Please add any relevant nuances and subtleties of the task force discussion; including anything that doesn't fit in any other PICOST section but the task force/CEs feels this information is contributory to the question: e.g. pre-specified subgroups. If it is anticipated that there will be insufficient direct evidence, and

indirect evidence will be used to answer the question, it needs to be documented clearly what is meant by indirect and confirm indirect evidence exists.

The area is understudied.

Our initial review of the literature indicates that we are unlikely to identify any evidence that directly addresses our PICOST.

If direct evidence cannot be identified, we plan to summarise evidence across four key areas:

- Frequency of front-of-neck access attempts across different populations (e.g. cardiac arrest, trauma)
- Reported success rates of front-of-neck access attempts (including details of population, type of technique)
- Complications associated with front-of-neck access attempts (including details of population, type of technique)
- Outcomes of patients that receive front-of-neck access attempts (including details of population, type of technique)

6. **Possible Outcomes:** *(These may be updated/modified after the SR search is performed and the total number of critical or important outcomes should be no more than 7)*

For direct evidence:

- Health-related quality of life
- Survival to hospital discharge/ 30 days with favorable neurological function
- Survival to hospital discharge/ 30 days
- Return of spontaneous circulation

For indirect evidence (as outlined in section 5):

- Frequency of front-of-neck access attempts
- Success rates
- Complications

7. **Key recent studies:** *(To guide this and future searches, please include sentinel papers or any anticipated publications (including estimated date of publication) that are appropriate to answer this PICOST. Please insert full references)*

Aziz S, Foster E, Lockey DJ, et al. Emergency scalpel cricothyroidotomy use in a prehospital trauma service: a 20-year review. *Emergency Medicine Journal* 2021;38:349-354.

Murphy D, Bulger N, Harrington B, et al. Fewer Tracheal Intubation Attempts are Associated with Improved Neurologically Intact Survival Following Out-of-Hospital Cardiac Arrest. *Resuscitation* 2021; <https://doi.org/10.1016/j.resuscitation.2021.07.001>

8. **Is there an existing detailed (e.g. IS developed) search strategy?**

Yes  or No

If no, please complete the following questions to provide assistance to the information specialist.

Search strategy in question 10 was developed in conjunction with information specialist

9. **Recent systematic reviews:** *(directly or indirectly addressing this PICO. Please insert full references)*

DeVore EK, Redmann A, Howell R, Khosla S. Best practices for emergency surgical airway: A systematic review. *Laryngoscope Investig Otolaryngol.* 2019;4(6):602-608. doi: 10.1002/liv.2.314.

Langvad S, Hyldmo PK, Nakstad AR, Vist GE, Sandberg M. Emergency cricothyrotomy--a systematic review. *Scand J Trauma Resusc Emerg Med.* 2013;21:43. doi: 10.1186/1757-7241-21-43.

Park L, Zeng I, Brainard A. Systematic review and meta-analysis of first-pass success rates in emergency department intubation: Creating a benchmark for emergency airway care. *Emerg Med Australas.* 2017 Feb;29(1):40-47. doi: 10.1111/1742-6723.12704.

Zasso FB, You-Ten KE, Ryu M, Losyeva K, Tanwani J, Siddiqui N. Complications of cricothyroidotomy versus tracheostomy in emergency surgical airway management: a systematic review. *BMC Anesthesiol.* 2020;20(1):216. doi: 10.1186/s12871-020-01135-2.

## 10. Suggested specific search terms/keywords

|    |                                                                           |
|----|---------------------------------------------------------------------------|
| 1  | Tracheostom*.mp. or exp Tracheostomy/                                     |
| 2  | Tracheotom*.mp. or exp Tracheotomy/                                       |
| 3  | cricothy*.mp.                                                             |
| 4  | front of neck.mp.                                                         |
| 5  | High Frequency Jet Ventilation.mp. or exp High-Frequency Jet Ventilation/ |
| 6  | HFJV.mp.                                                                  |
| 7  | Surgical airway.mp.                                                       |
| 8  | 1 or 2 or 3 or 4 or 5 or 6 or 7                                           |
| 9  | exp Heart Arrest/                                                         |
| 10 | {cardiac arrest* or CPR}.mp. or exp Cardiopulmonary Resuscitation/        |
| 11 | Resuscitation*.mp.                                                        |
| 12 | exp Advanced Cardiac Life Support/ or Advanced Cardiac Life Support*.mp.  |
| 13 | exp Tachycardia, Ventricular/ or exp Ventricular Fibrillation/ or VF.mp.  |
| 14 | exp Multiple Trauma/                                                      |
| 15 | polytrauma.mp.                                                            |
| 16 | Out of hospital.mp.                                                       |
| 17 | Prehospital.mp.                                                           |
| 18 | Pre-hospital.mp.                                                          |
| 19 | Emergency medical services.mp. or exp Emergency Medical Services/         |
| 20 | exp Emergency Responders/                                                 |
| 21 | Emergency medical technician.mp. or exp Emergency Medical Technicians/    |
| 22 | EMT.mp.                                                                   |
| 23 | Paramedic*.mp.                                                            |
| 24 | exp Ambulances/                                                           |
| 25 | exp Air Ambulances/ or Air Ambulance*.mp.                                 |
| 26 | Helicopter emergency medical services.mp.                                 |
| 27 | HEMS.mp.                                                                  |
| 28 | Emergency department.mp. or exp Emergency Service, Hospital/              |
| 29 | Emergency room.mp.                                                        |

|    |                                                                                                                                                                                                                                                                                                         |
|----|---------------------------------------------------------------------------------------------------------------------------------------------------------------------------------------------------------------------------------------------------------------------------------------------------------|
| 30 | exp Emergency Treatment/                                                                                                                                                                                                                                                                                |
| 31 | exp Emergency Medicine/                                                                                                                                                                                                                                                                                 |
| 32 | exp Hospital Rapid Response Team/                                                                                                                                                                                                                                                                       |
| 33 | exp Military Health Services/ or exp Hospitals, Military/ or Military*.mp.                                                                                                                                                                                                                              |
| 34 | 9 or 10 or 11 or 12 or 13 or 14 or 15 or 16 or 17 or 18 or 19 or 20 or 21 or 22 or 23 or 24 or 25 or 26 or 27 or 28 or 29 or 30 or 31 or 32 or 33                                                                                                                                                       |
| 35 | Operat* room.mp. or exp Anesthesia/                                                                                                                                                                                                                                                                     |
| 36 | intensive care unit*.mp.                                                                                                                                                                                                                                                                                |
| 37 | exp Critical Care/ or Critical care unit*.mp.                                                                                                                                                                                                                                                           |
| 38 | Operat* theatre.mp. [mp=title, abstract, original title, name of substance word, subject heading word, floating sub-heading word, keyword heading word, organism supplementary concept word, protocol supplementary concept word, rare disease supplementary concept word, unique identifier, synonyms] |
| 39 | 35 or 36 or 37 or 38                                                                                                                                                                                                                                                                                    |
| 40 | Can* intubate can* oxygenate*.mp.                                                                                                                                                                                                                                                                       |
| 41 | CICO.mp.                                                                                                                                                                                                                                                                                                |
| 42 | Can* intubate can* Ventilate*.mp.                                                                                                                                                                                                                                                                       |
| 43 | CICV.mp.                                                                                                                                                                                                                                                                                                |
| 44 | Difficult intubation.mp.                                                                                                                                                                                                                                                                                |
| 45 | Failed intubation.mp.                                                                                                                                                                                                                                                                                   |
| 46 | Difficult airway.mp.                                                                                                                                                                                                                                                                                    |
| 47 | 40 or 41 or 42 or 43 or 44 or 45 or 46                                                                                                                                                                                                                                                                  |
| 48 | 39 and 47                                                                                                                                                                                                                                                                                               |
| 49 | 34 or 48                                                                                                                                                                                                                                                                                                |
| 50 | 8 and 49                                                                                                                                                                                                                                                                                                |

## S2- Data extraction items

| <b>Data Extractor</b> | <b>Paper Characteristics</b> | <b>Direct or Indirect Outcome</b>                                                          |
|-----------------------|------------------------------|--------------------------------------------------------------------------------------------|
| Name                  | Paper title                  | Short-term survival: Includes survival to hospital admission and survival in hospital      |
| Email                 | First author's name          | Medium-term survival: Survival to hospital discharge                                       |
| Extraction date       | Year of publication          | Long-term survival: Survival for 30 days or discharge with favourable neurological outcome |
|                       | Country of the data          | Return of spontaneous circulation                                                          |
|                       | Research period              | Frequency of FONA attempts                                                                 |
|                       | Population studies           | Success rate                                                                               |
|                       | Study design                 | Complications                                                                              |
|                       | Number of participants       |                                                                                            |
|                       | Participant description      |                                                                                            |
|                       | Patients' characteristics    |                                                                                            |
|                       | Provider of eFONA            |                                                                                            |
|                       | Setting of eFONA             |                                                                                            |
|                       | Population studied           |                                                                                            |
|                       | Indications for eFONA        |                                                                                            |

### S3- MEDLINE search strategy

- 1 Tracheostom\*.mp. or exp Tracheostomy/
- 2 Tracheotom\*.mp. or exp Tracheotomy/
- 3 cricothy\*.mp.
- 4 front of neck.mp.
- 5 High Frequency Jet Ventilation.mp. or exp High-Frequency Jet Ventilation /
- 6 HFJV.mp.
- 7 Surgical airway.mp.
- 8 1 or 2 or 3 or 4 or 5 or 6 or 7
- 9 exp Heart Arrest/
- 10 (cardiac arrest\* or CPR).mp. or exp Cardiopulmonary Resuscitation/
- 11 Resuscitation\*.mp.
- 12 exp Advanced Cardiac Life Support/ or Advanced Cardiac Life Support\*.mp.
- 13 exp Tachycardia, Ventricular/ or exp Ventricular Fibrillation/ or VF.mp.
- 14 exp Multiple Trauma/
- 15 polytrauma.mp.
- 16 Out of hospital.mp.
- 17 Prehospital.mp.
- 18 Pre-hospital.mp.
- 19 Emergency medical services.mp. or exp Emergency Medical Services/
- 20 exp Emergency Responders/
- 21 Emergency medical technician.mp. or exp Emergency Medical Technicians/
- 22 EMT.mp.
- 23 Paramedic\*.mp.
- 24 exp Ambulances/
- 25 exp Air Ambulances/ or Air Ambulance\*.mp.
- 26 Helicopter emergency medical services.mp.
- 27 HEMS.mp.
- 28 Emergency department.mp. or exp Emergency Service, Hospital/
- 29 Emergency room.mp.
- 30 exp Emergency Treatment/
- 31 exp Emergency Medicine/
- 32 exp Hospital Rapid Response Team/
- 33 exp Military Health Services/ or exp Hospitals, Military/ or Military\*.mp.
- 34 9 or 10 or 11 or 12 or 13 or 14 or 15 or 16 or 17 or 18 or 19 or 20 or 21 or 22 or 23 or 24 or 25 or 26 or
- 27 or 28 or 29 or 30 or 31 or 32 or 33
- 35 Operat\* room.mp. or exp Anesthesia/
- 36 intensive care unit\*.mp.
- 37 exp Critical Care/ or Critical care unit\*.mp.
- 38 Operat\* theatre.mp. [mp=title, abstract, original title, name of substance word, subject heading word, floating sub-heading word, keyword heading word, organism supplementary concept word, protocol supplementary concept word, rare disease supplementary concept word, unique identifier, synonyms]
- 39 35 or 36 or 37 or 38
- 40 Can\* intubate can\* oxygenate\*.mp.
- 41 CICO.mp.
- 42 Can\* intubate can\* Ventilate\*.mp.
- 43 CICV.mp.
- 44 Difficult intubation.mp.
- 45 Failed intubation.mp.
- 46 Difficult airway.mp.
- 47 40 or 41 or 42 or 43 or 44 or 45 or 46



48 39 and 47  
49 34 or 48  
50 8 and 49

## S4- Embase search strategy

- 1 Tracheostom\*.mp. or exp Tracheostomy/
- 2 Tracheotom\*.mp. or exp Tracheotomy/
- 3 cricothy\*.mp.
- 4 front of neck.mp.
- 5 High Frequency Jet Ventilation.mp. or exp High-Frequency Jet Ventilation/
- 6 HFJV.mp.
- 7 Surgical airway.mp.
- 8 1 or 2 or 3 or 4 or 5 or 6 or 7
- 9 exp Heart Arrest/
- 10 (cardiac arrest\* or CPR).mp. or exp Cardiopulmonary Resuscitation/
- 11 Resuscitation\*.mp.
- 12 exp Advanced Cardiac Life Support/ or Advanced Cardiac Life Support\*.mp.
- 13 exp Tachycardia, Ventricular/ or exp Ventricular Fibrillation/ or VF.mp.
- 14 exp Multiple Trauma/
- 15 polytrauma.mp.
- 16 Out of hospital.mp.
- 17 Prehospital.mp.
- 18 Pre-hospital.mp.
- 19 Emergency medical services.mp. or exp Emergency Medical Services/
- 20 exp Emergency Responders/
- 21 Emergency medical technician.mp. or exp Emergency Medical Technicians/
- 22 EMT.mp.
- 23 Paramedic\*.mp.
- 24 exp Ambulances/
- 25 exp Air Ambulances/ or Air Ambulance\*.mp.
- 26 Helicopter emergency medical services.mp.
- 27 HEMS.mp.
- 28 Emergency department.mp. or exp Emergency Service, Hospital/
- 29 Emergency room.mp.
- 30 exp Emergency Treatment/
- 31 exp Emergency Medicine/
- 32 exp Hospital Rapid Response Team/
- 33 exp Military Health Services/ or exp Hospitals, Military/ or Military\*.mp.
- 34 9 or 10 or 11 or 12 or 13 or 14 or 15 or 16 or 17 or 18 or 19 or 20 or 21 or 22 or 23 or 24 or 25 or 26 or 27 or 28 or 29 or 30 or 31 or 32 or 33
- 35 Operat\* room.mp. or exp Anesthesia/
- 36 intensive care unit\*.mp.
- 37 exp Critical Care/ or Critical care unit\*.mp.
- 38 Operat\* theatre.mp. [mp=title, abstract, original title, name of substance word, subject heading word, floating sub-heading word, keyword heading word, organism supplementary concept word, protocol supplementary concept word, rare disease supplementary concept word, unique identifier, synonyms]
- 39 35 or 36 or 37 or 38
- 40 Can\* intubate can\* oxygenate\*.mp.
- 41 CICO.mp.
- 42 Can\* intubate can\* Ventilate\*.mp.
- 43 CICV.mp.
- 44 Difficult intubation.mp.
- 45 Failed intubation.mp.
- 46 Difficult airway.mp.
- 47 40 or 41 or 42 or 43 or 44 or 45 or 46

48 39 and 47  
49 34 or 48  
50 8 and 49

## S5- Cochrane library search strategy

- 1 Tracheostom\*
- 2 MeSH descriptor: [Tracheostomy] explode all trees
- 3 Tracheotom\*
- 4 MeSH descriptor: [Tracheotomy] explode all trees
- 5 cricothy\*
- 6 front of neck
- 7 MeSH descriptor: [High-Frequency Jet Ventilation] explode all trees
- 8 High Frequency Jet Ventilation
- 9 HFJV
- 10 Surgical airway
- 11 #1 or #2 or #3 or #4 or #5 or #6 or #7 or #8 or #9 or #10
- 12 MeSH descriptor: [Heart Arrest] explode all trees
- 13 cardiac arrest\* or CPR
- 14 MeSH descriptor: [Cardiopulmonary Resuscitation] explode all trees
- 15 MeSH descriptor: [Advanced Cardiac Life Support] explode all trees
- 16 Advanced Cardiac Life Support\*
- 17 MeSH descriptor: [Tachycardia, Ventricular] explode all trees
- 18 MeSH descriptor: [Ventricular Fibrillation] explode all trees
- 19 VF.
- 20 MeSH descriptor: [Multiple Trauma] explode all trees
- 21 polytrauma
- 22 Out of hospital
- 23 Prehospital
- 24 Pre-hospital
- 25 Emergency medical services
- 26 MeSH descriptor: [Emergency Medical Services] explode all trees
- 27 MeSH descriptor: [Emergency Responders] explode all trees
- 28 Emergency medical technician
- 29 MeSH descriptor: [Emergency Medical Technicians] explode all trees
- 30 EMT
- 31 Paramedic\*
- 32 MeSH descriptor: [Ambulances] in all MeSH products
- 33 MeSH descriptor: [Air Ambulances] explode all trees
- 34 Air Ambulance\*
- 35 Helicopter emergency medical services
- 36 HEMS
- 37 Emergency department
- 38 MeSH descriptor: [Emergency Service, Hospital] explode all trees
- 39 Emergency room
- 40 MeSH descriptor: [Emergency Treatment] explode all trees
- 41 MeSH descriptor: [Emergency Medicine] explode all trees
- 42 MeSH descriptor: [Hospital Rapid Response Team] explode all trees
- 43 MeSH descriptor: [Military Health Services] explode all trees
- 44 MeSH descriptor: [Hospitals, Military] explode all trees
- 45 Military\*
- 46 #12 or #13 or #14 or #15 or #16 or #17 or #18 or #19 or #20 or #21 or #22 or #23 or #24 or #25 or #26 or #27 or #28 or #29 or #30 or #31 or #32 or #33 or #34 or #35 or #36 or #37 or #38 or #39 or #40 or #41 or #42 or #43 or #44 or #45 or #46
- 47 Operat\* room
- 48 MeSH descriptor: [Anesthesia] explode all trees

49 intensive care unit\*  
50 MeSH descriptor: [Critical Care] explode all trees  
51 Critical care unit\*  
52 Operat\* theatre  
53 #48 or #49 or #50 or #51 or #52 or #53  
54 Can\* intubate can\* oxygenate\*  
55 CICO  
56 Can\* intubate can\* Ventilate\*  
57 CICV  
58 Difficult intubation  
59 Failed intubation  
60 Difficult airway  
61 #55 or #56 or #57 or #58 or #59 or #60 or #61  
62 #54 and #62  
63 #47 or # 63  
64 #11 and #64
